# Supplementary material for: Clinically applicable histopathological diagnosis system for gastric cancer detection using deep learning
Source: PubMed Central journal article supplement (PMC7453200; doi:10.1038/s41467-020-18147-8), 2020-08-27
Supplement: 41467_2020_18147_MOESM2_ESM.pdf [file 41467_2020_18147_MOESM2_ESM.pdf]

**Clinically applicable histopathological diagnosis system for  
gastric cancer detection using deep learning**

Song et al.

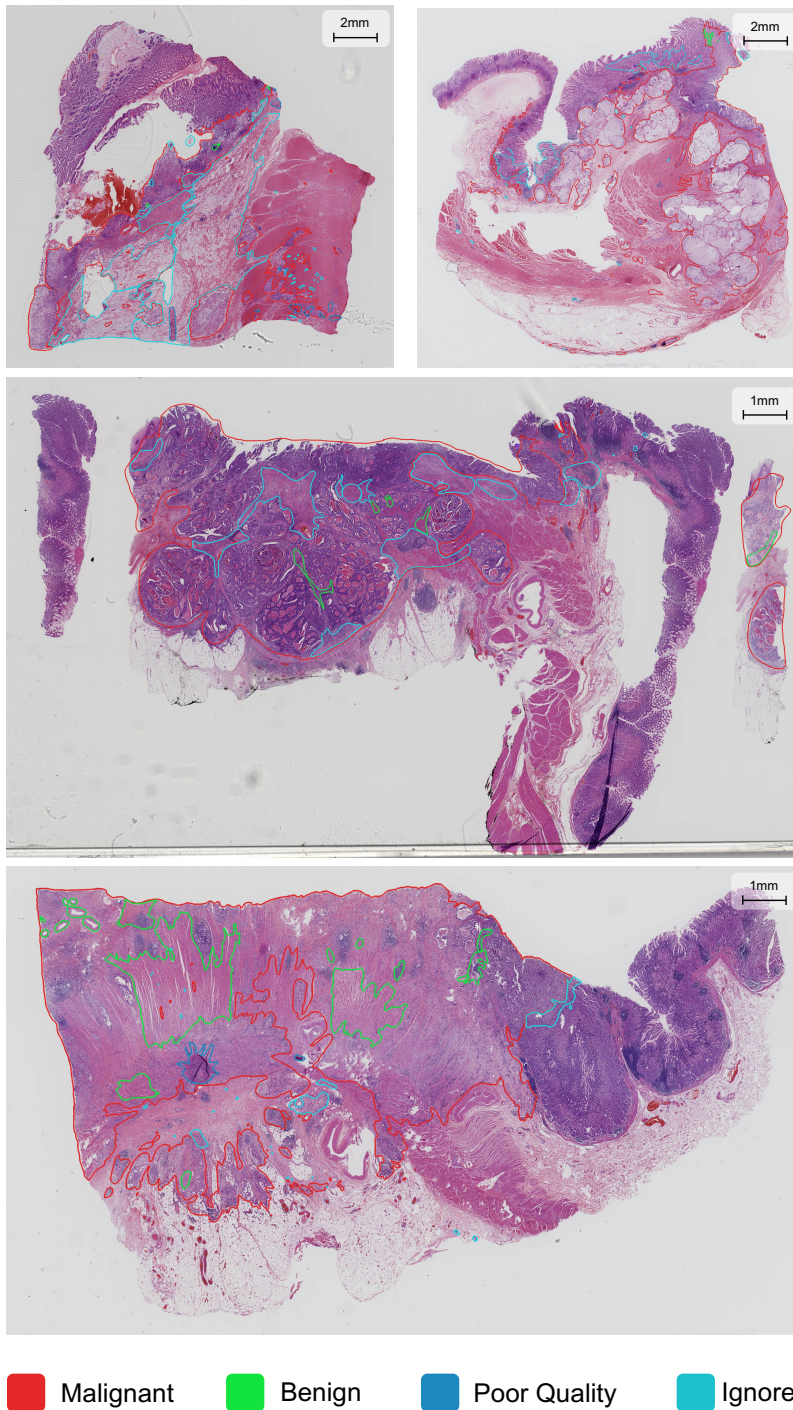

Figure 1: **Four examples of labelled WSIs.** The WSIs underwent the three-step annotation procedure. We obtained similar annotation results repeating the procedure three times.

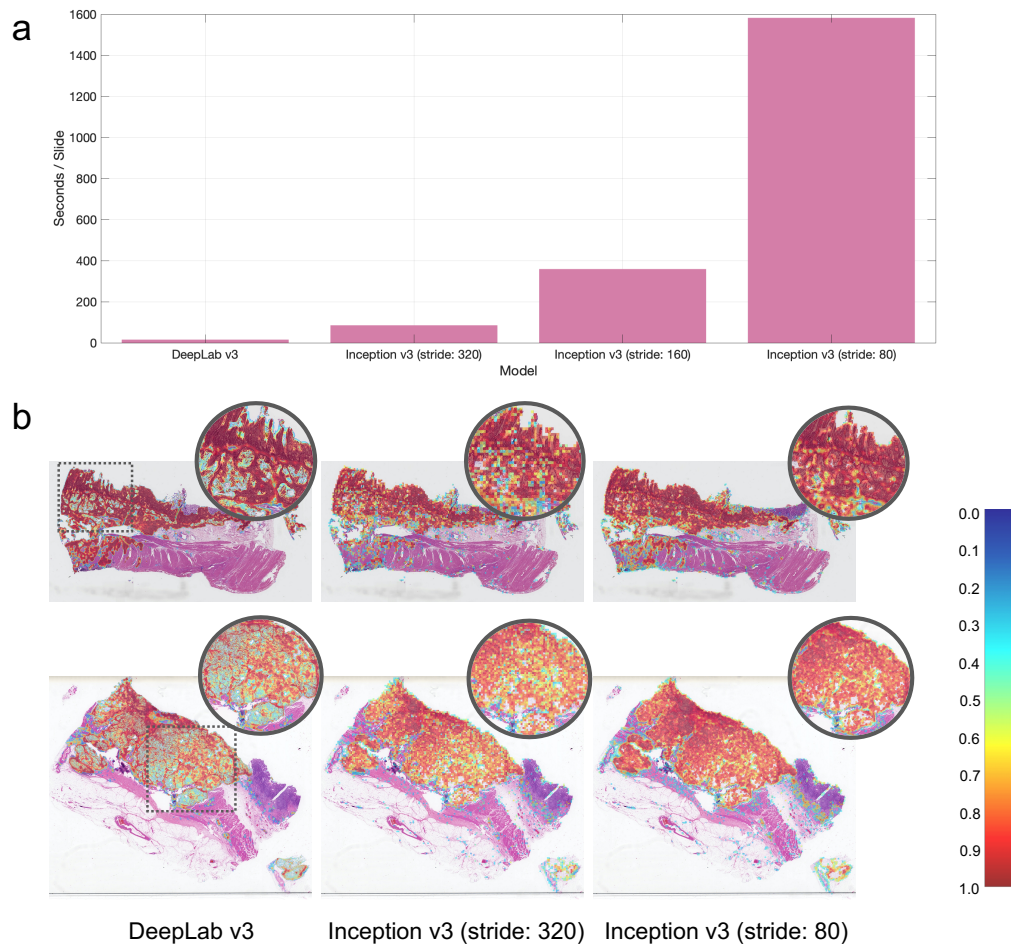

Figure 2: **Comparison between segmentation (DeepLab v3) and classification (Inception v3) models.** **a**, The average prediction time for 10 slides with size around 500 MB (with 4 GPUs). For the segmentation model, in the inference stage, we used tiles of  $2,000 \times 2,000$  pixels and a 10 percent overlap ratio. For the classification model, we used tiles of size  $320 \times 320$  pixels with different strides. **b**, Several predicted heatmaps from the models, we could see that the segmentation model reveals more interpretable predictions.

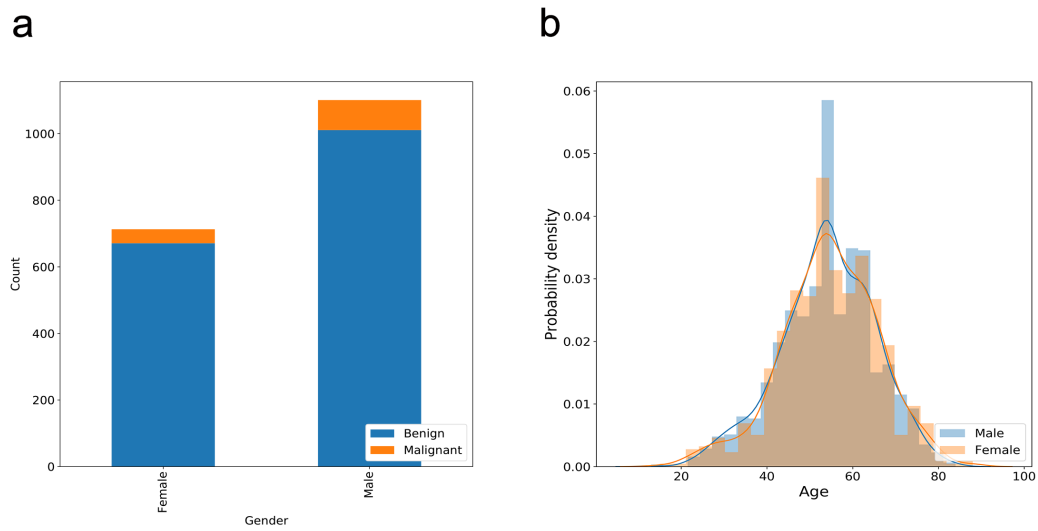

Figure 3: **Patient-level data distribution of the daily gastric dataset. a**, Patient gender distribution. **b**, Patient age distribution.

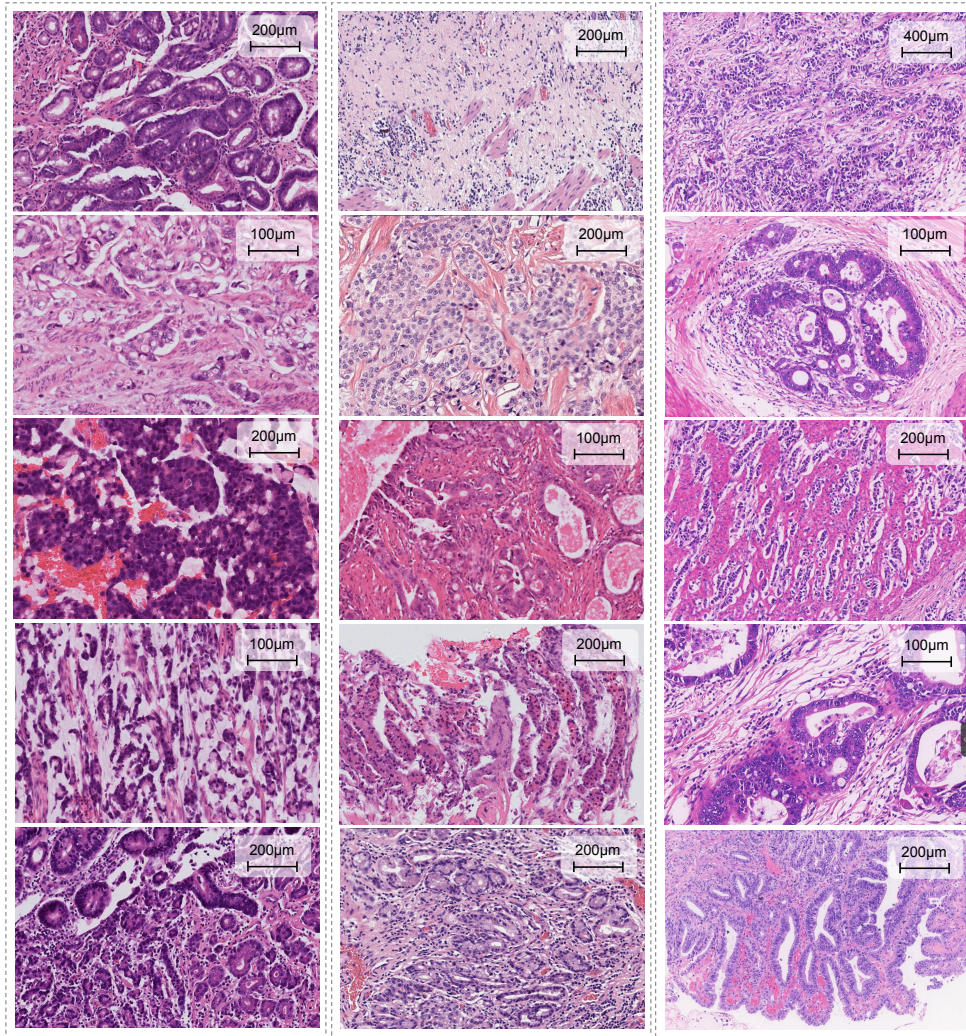

Hamamatsu

Roche

KFBio

Figure 4: **Example WSIs digitalized by three different scanners from the daily gastric dataset.**

All the images were captured with a 20× objective. The slides were digitalized for ten times, and we obtained similar results.

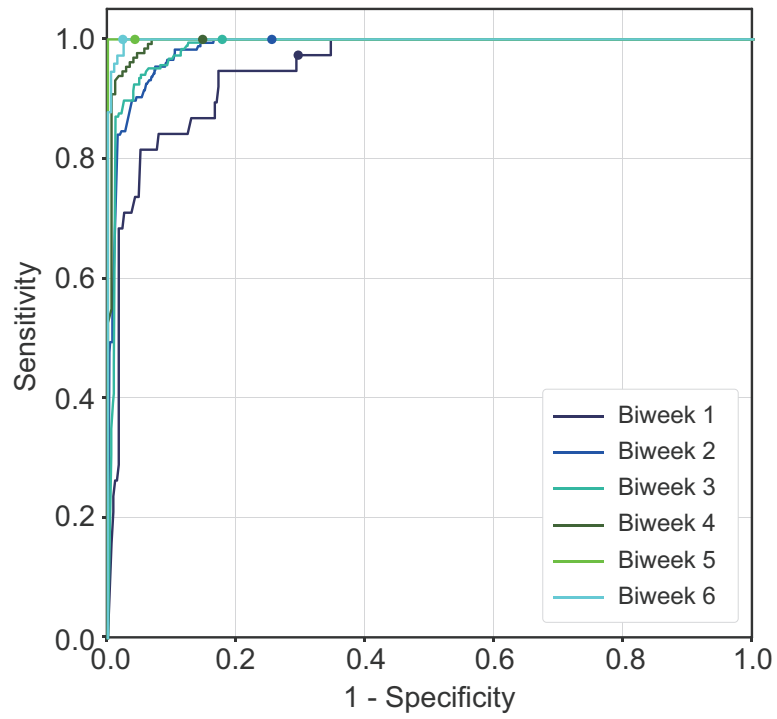

Figure 5: **Model performance on the daily gastric dataset.**

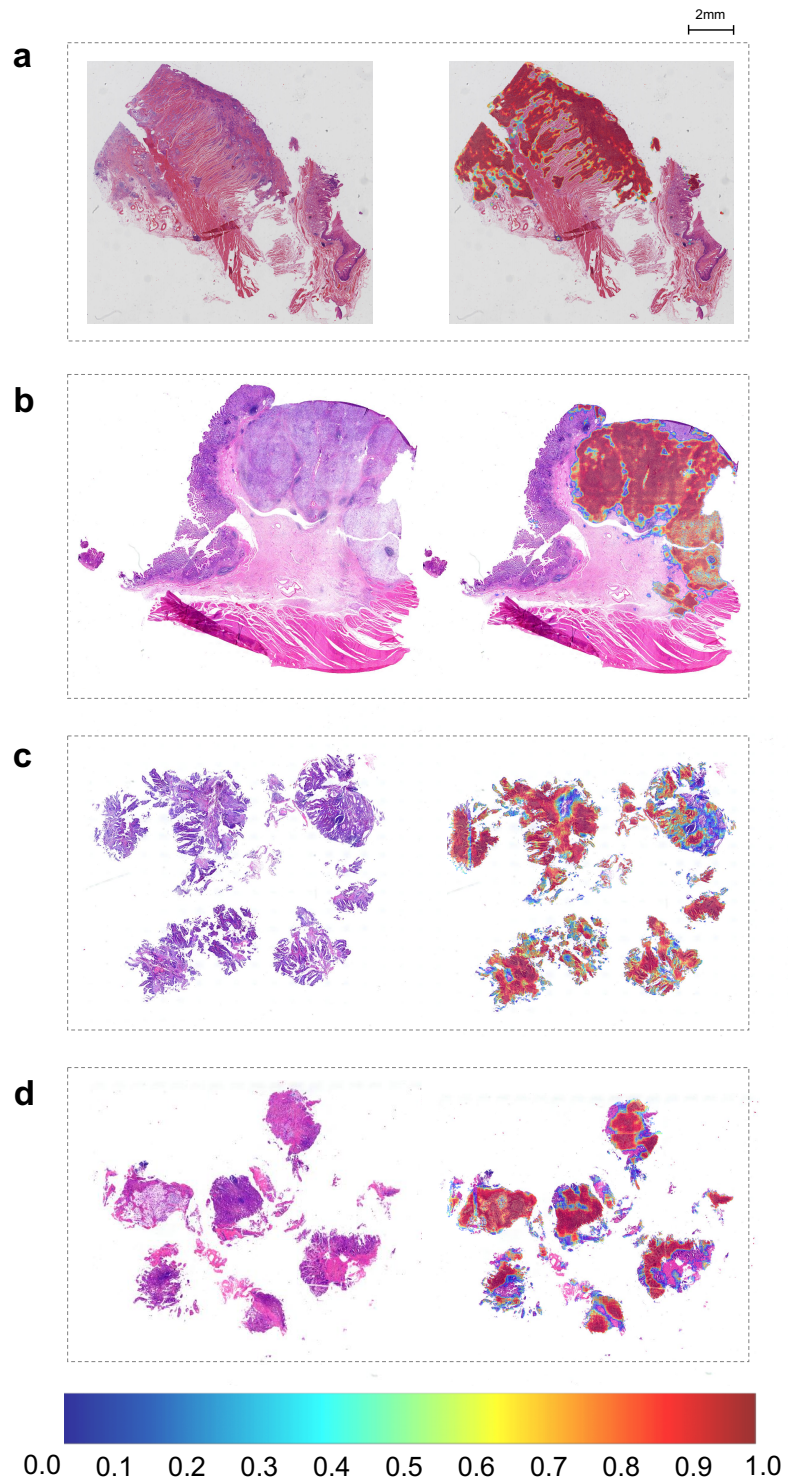

Figure 6: Four examples of deep learning model predictions in the form of heatmaps.

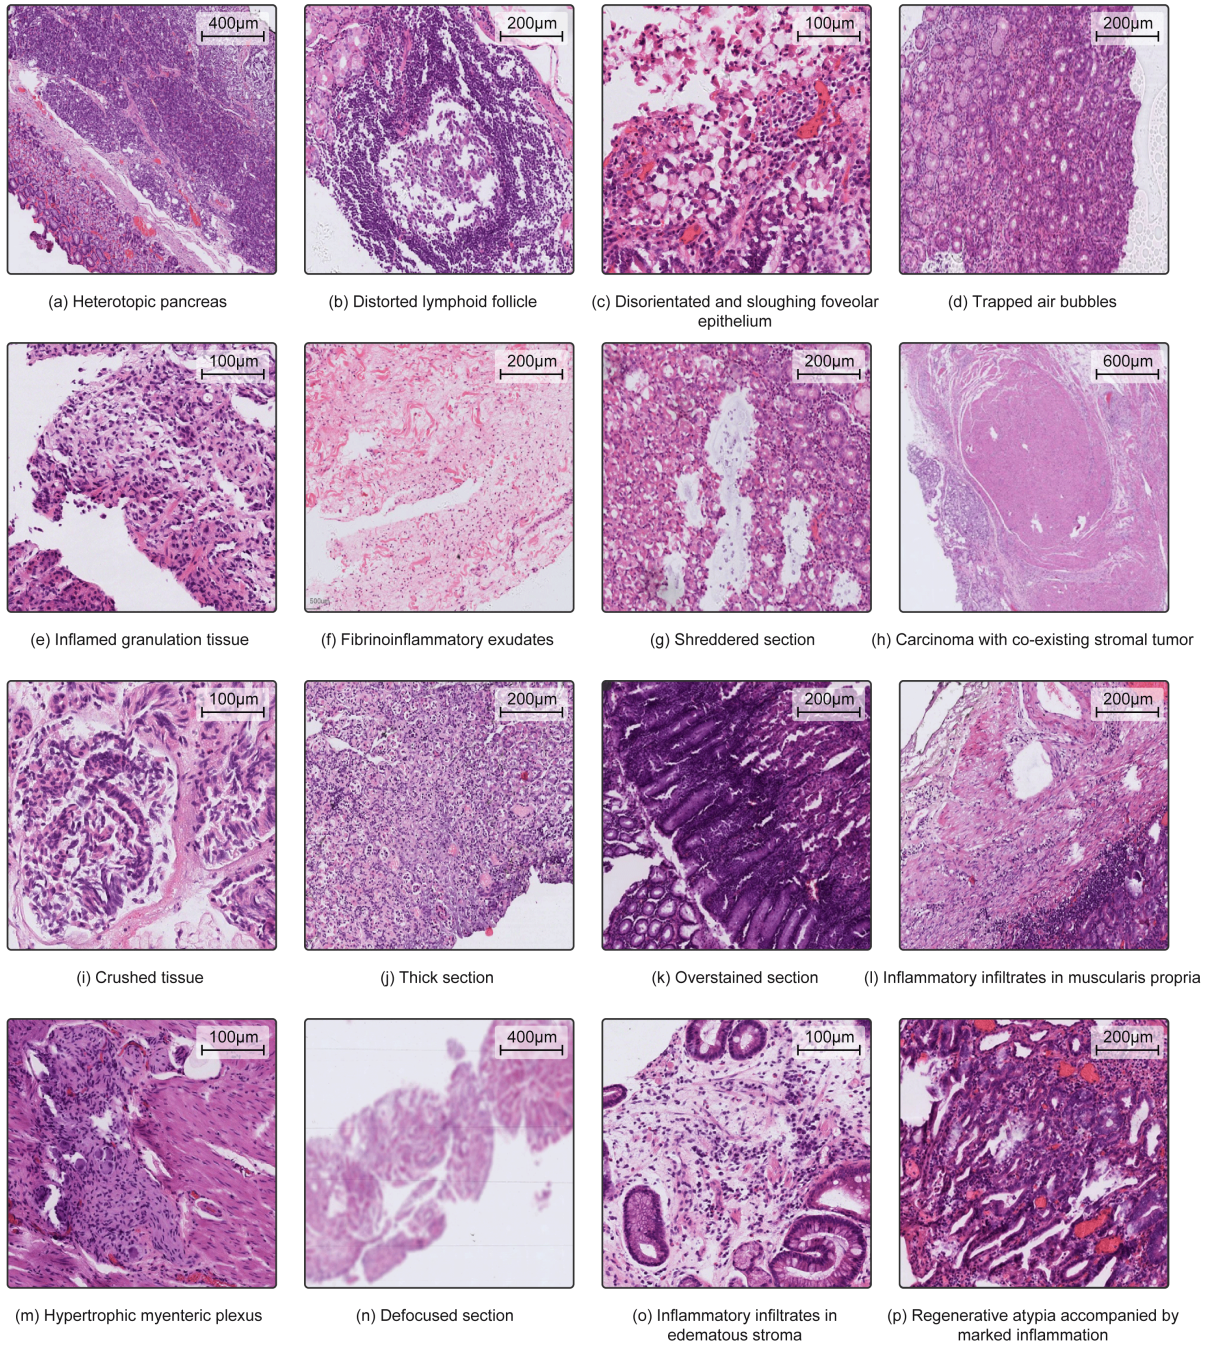

Figure 7: **More false-positive cases.** The experiment was performed five times, and we obtained the same results.



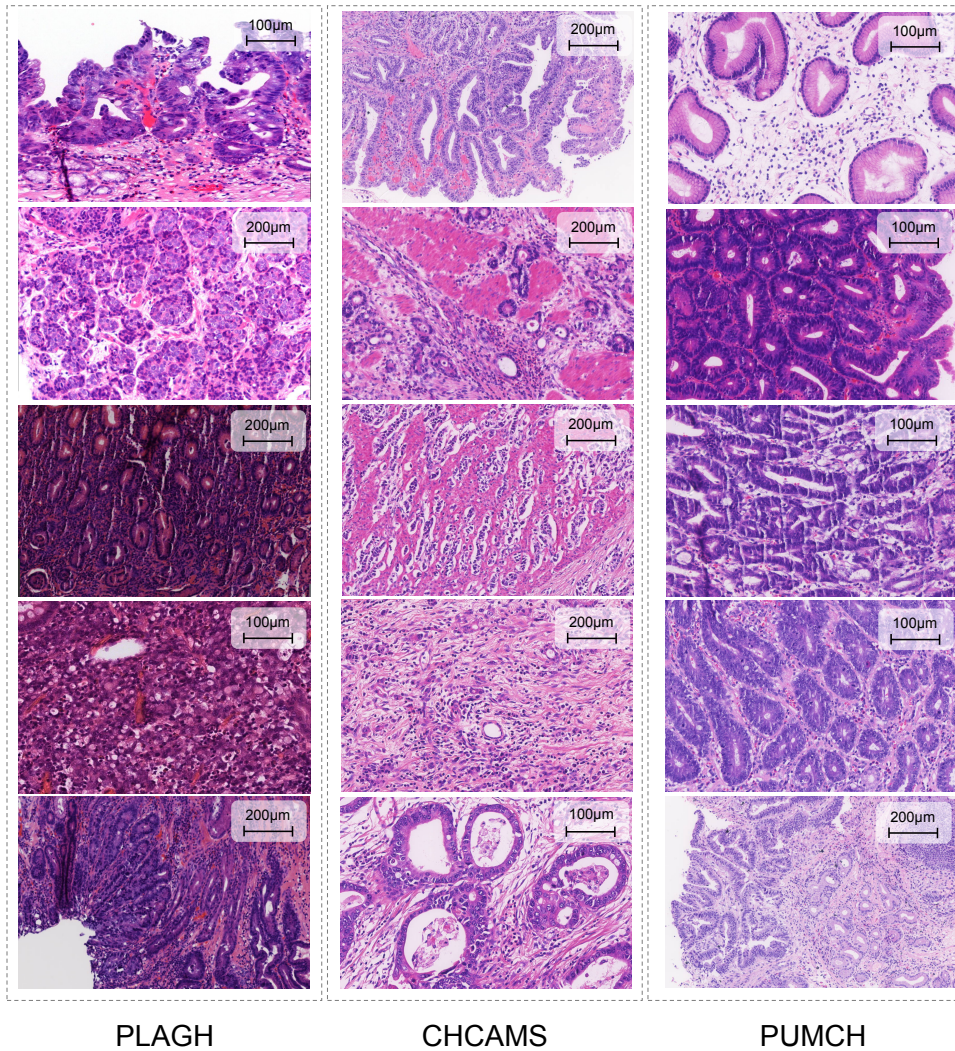

Figure 8: **Example WSIs with visual difference digitalized by KF-Pro-005 from three hospitals.** PLAGH and PUMCH used automatic H&E staining with Leica AutoStainer XL in practice, while CHCAMS adopted automatic H&E staining with Roche Ventana HE 600. Significant visual difference could be found in the images. All the images were captured with a 20× objective. The slides were prepared three times from the same blocks, and we observed similar visual appearances.

**PLAGH**

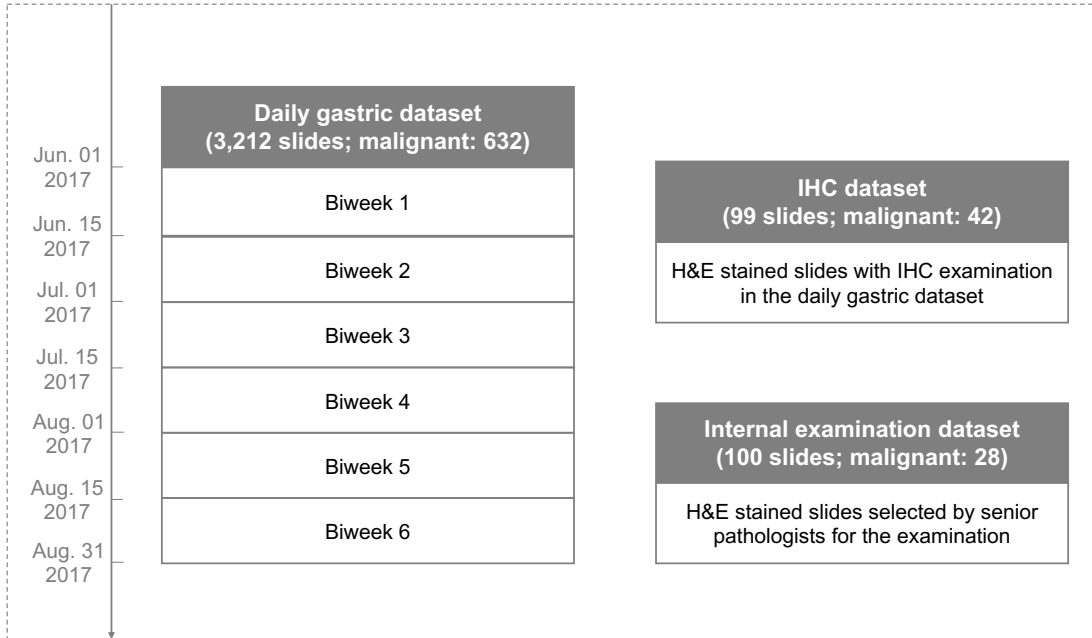

**Multicenter**

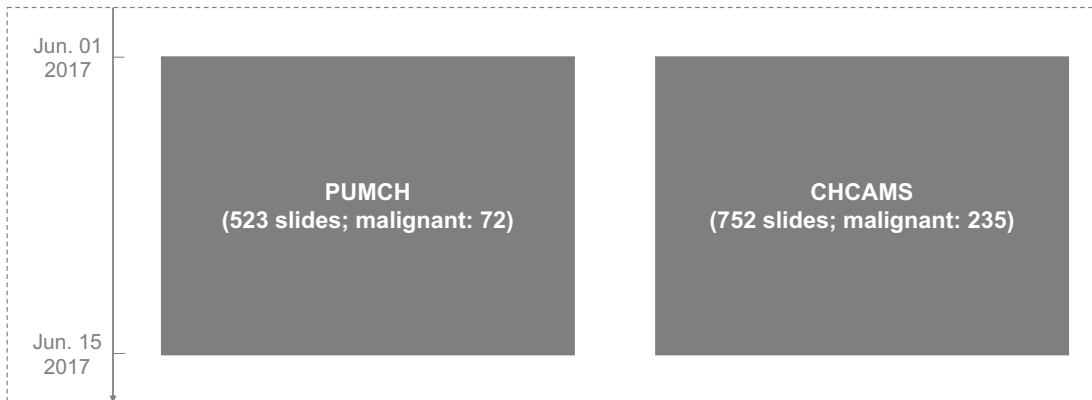

Figure 9: **Illustration of the test datasets.**

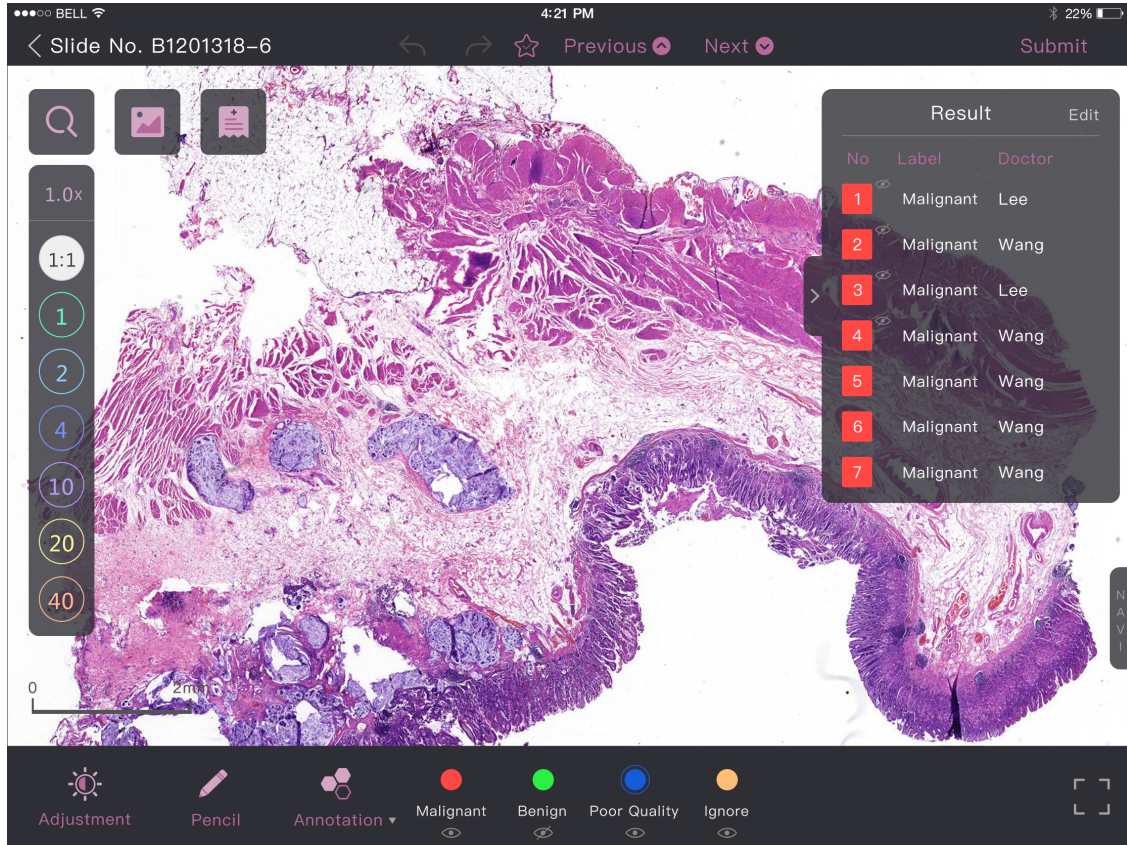

Figure 10: iPad-based annotation system interface.

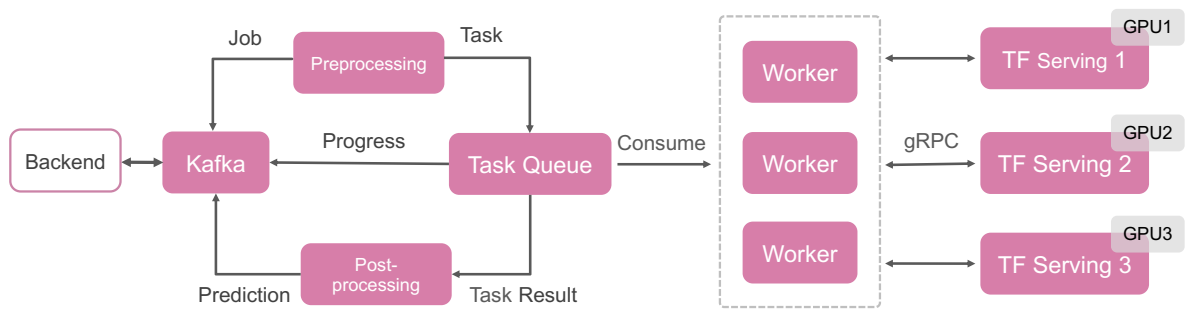

Figure 11: **AI assistance system architecture.**

| GPU Number | Server Cost | Processing Capacity / 12 Hours |
|------------|-------------|--------------------------------|
| 1          | \$4,000     | 200 Slides                     |
| 2          | \$7,000     | 400 Slides                     |
| 3          | \$11,000    | 600 Slides                     |
| 4          | \$14,000    | 800 Slides                     |

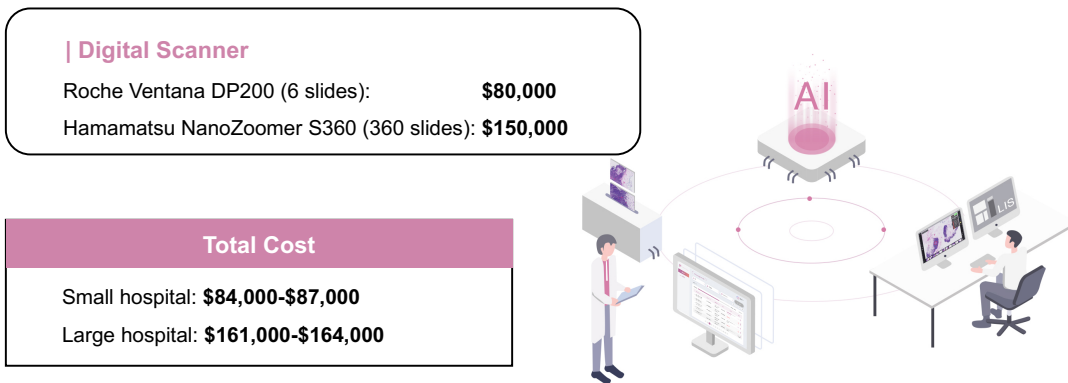

Figure 12: **A complete cost analysis of the whole assistance system.** The cost for the digital scanners were estimations of the current market price. The server hardware configuration was: [CPU] Intel Core i7, [Memory] 32GB, [Solid State Disk] 1TB, [Hard Disk Drive] 10TB, [GPU] NVIDIA Tesla P100. The cost of the diagnostic system was not included.

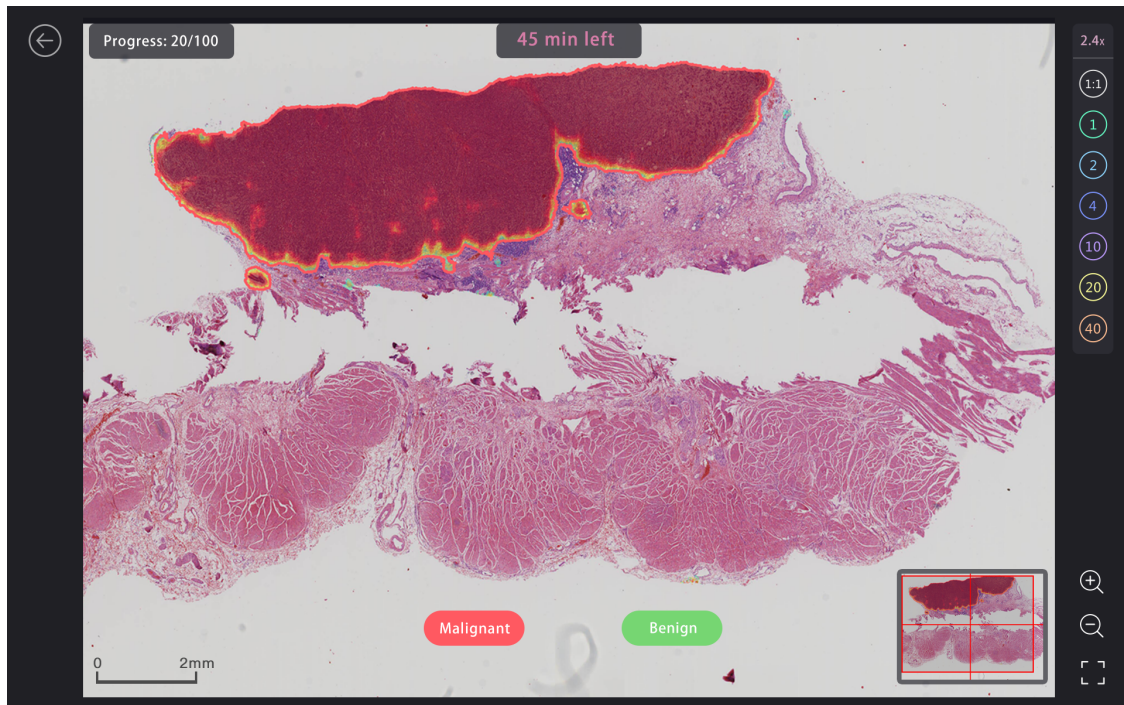

Figure 13: **The interface of the AI assistance system used in the internal examination.** The inference was performed five times, and we obtained the same result.

**Table 1: Abbreviations of tumour subtypes.**

|       |                                      |
|-------|--------------------------------------|
| HGIN  | High grade intraepithelial neoplasia |
| TAC   | Tubular adenocarcinoma               |
| MucAC | Mucinous adenocarcinoma              |
| PCC   | Poorly cohesive carcinoma            |
| MixAC | Mixed adenocarcinoma                 |

**Table 2: Details of annotation pathologists.**

| Name         | Position                    | Education | Experience (year) | Role        |
|--------------|-----------------------------|-----------|-------------------|-------------|
| Huaiyin Shi  | Chief Pathologist           | PhD       | 31                | Final check |
| Zhigang Song | Associate Chief Pathologist | Master    | 16                | Final check |
| Zhanbo Wang  | Associate Chief Pathologist | Master    | 16                | Labelling   |
| Jing Yuan    | Associate Chief Pathologist | PhD       | 16                | Labelling   |
| Chunkai Yu   | Associate Chief Pathologist | PhD       | 16                | Labelling   |
| Yong Huang   | Attending Pathologist       | PhD       | 19                | Labelling   |
| Jinhong Liu  | Attending Pathologist       | PhD       | 16                | Labelling   |
| Xiaohui Ding | Attending Pathologist       | Master    | 16                | Labelling   |
| Xin Chen     | Attending Pathologist       | Master    | 7                 | Labelling   |
| Wei Jin      | Attending Pathologist       | Master    | 7                 | Labelling   |
| Xiangnan Gou | Attending Pathologist       | Master    | 7                 | Labelling   |
| Liwei Shao   | Attending Pathologist       | Master    | 4                 | Labelling   |



**Table 3: Performance of different slide-level prediction approaches on the validation dataset.**

| Predictor                | AUC   | Sensitivity | Specificity | Accuracy |
|--------------------------|-------|-------------|-------------|----------|
| Random forest            | 0.973 | 0.986       | 0.623       | 0.790    |
| Top 10 probabilities     | 0.983 | 0.986       | 0.532       | 0.753    |
| Top 100 probabilities    | 0.983 | 0.986       | 0.571       | 0.773    |
| Top 200 probabilities    | 0.982 | 0.986       | 0.604       | 0.790    |
| Top 500 probabilities    | 0.985 | 0.986       | 0.636       | 0.807    |
| Top 1,000 probabilities  | 0.988 | 0.986       | 0.740       | 0.860    |
| Top 2,000 probabilities  | 0.983 | 0.986       | 0.734       | 0.857    |
| Top 5,000 probabilities  | 0.979 | 0.986       | 0.721       | 0.850    |
| Top 10,000 probabilities | 0.976 | 0.986       | 0.675       | 0.827    |

**Table 4: Performance of different classification and segmentation models for patch-level classification on the validation dataset.**

| Deep learning model | AUC   | Sensitivity | Specificity | Accuracy |
|---------------------|-------|-------------|-------------|----------|
| ResNet-50           | 0.853 | 0.779       | 0.777       | 0.778    |
| Inception v3        | 0.887 | 0.864       | 0.765       | 0.806    |
| DenseNet            | 0.834 | 0.804       | 0.713       | 0.750    |
| U-Net               | 0.779 | 0.950       | 0.369       | 0.550    |
| DeepLab v2          | 0.884 | 0.918       | 0.710       | 0.775    |
| DeepLab v3          | 0.945 | 0.944       | 0.780       | 0.833    |

Table 5: Model performance on the daily gastric WSI digitalized by three scanners.

| Digital scanner           | Total | Malignant | Benign | AUC   | Accuracy | Sensitivity | Specificity |
|---------------------------|-------|-----------|--------|-------|----------|-------------|-------------|
| KF-PRO-005                | 403   | 80        | 323    | 0.995 | 0.950    | 1.0         | 0.938       |
| Hamamatsu NanoZoomer S360 | 1832  | 352       | 1480   | 0.982 | 0.781    | 1.0         | 0.728       |
| Ventana DP200             | 977   | 200       | 777    | 0.992 | 0.918    | 0.995       | 0.898       |

Table 6: Pathologists' performance in the trainees' examination with one hour constraint.

| Group name | Pathologist ID | Individual performance |       |       |            | Group performance (average) |       |       |            |
|------------|----------------|------------------------|-------|-------|------------|-----------------------------|-------|-------|------------|
|            |                | Acc.                   | Sen.  | Spec. | Time (min) | Acc.                        | Sen.  | Spec. | Time (min) |
| Microscope | 6              | 0.820                  | 0.929 | 0.778 | 44         | 0.850                       | 0.821 | 0.861 | 53.30      |
|            | 8              | 0.870                  | 0.786 | 0.903 | 51         |                             |       |       |            |
|            | 9              | 0.830                  | 0.643 | 0.903 | 72         |                             |       |       |            |
|            | 10             | 0.880                  | 0.929 | 0.861 | 47         |                             |       |       |            |
| Digital    | 0              | 0.820                  | 0.429 | 0.972 | 48         | 0.845                       | 0.696 | 0.903 | 48.25      |
|            | 2              | 0.860                  | 0.750 | 0.903 | 45         |                             |       |       |            |
|            | 11             | 0.860                  | 0.857 | 0.861 | 52         |                             |       |       |            |
|            | 1              | 0.840                  | 0.750 | 0.875 | 48         |                             |       |       |            |
| AI         | 5              | 0.910                  | 0.786 | 0.958 | 41         | 0.858                       | 0.839 | 0.865 | 45.25      |
|            | 4              | 0.850                  | 0.786 | 0.875 | 43         |                             |       |       |            |
|            | 3              | 0.840                  | 0.964 | 0.792 | 47         |                             |       |       |            |
|            | 7              | 0.830                  | 0.821 | 0.833 | 50         |                             |       |       |            |

Table 7: Pathologists' performance in the trainees' examination without time constraint.

| Group name | Pathologist ID | Individual performance |       |       | Group performance (average) |       |       |       |            |
|------------|----------------|------------------------|-------|-------|-----------------------------|-------|-------|-------|------------|
|            |                | Acc.                   | Sen.  | Spec. | Time (min)                  | Acc.  | Sen.  | Spec. | Time (min) |
| Microscope | 1              | 0.820                  | 0.929 | 0.778 | 60                          | 0.810 | 0.911 | 0.771 | 59.25      |
|            | 2              | 0.880                  | 0.893 | 0.875 | 75                          |       |       |       |            |
|            | 7              | 0.810                  | 0.964 | 0.750 | 60                          |       |       |       |            |
|            | 11             | 0.730                  | 0.857 | 0.681 | 42                          |       |       |       |            |
| Digital    | 8              | 0.820                  | 0.821 | 0.819 | 30                          | 0.853 | 0.857 | 0.851 | 40         |
|            | 5              | 0.910                  | 0.821 | 0.944 | 46                          |       |       |       |            |
|            | 4              | 0.840                  | 0.893 | 0.819 | 41                          |       |       |       |            |
|            | 3              | 0.840                  | 0.893 | 0.819 | 43                          |       |       |       |            |
| AI         | 6              | 0.860                  | 0.893 | 0.847 | 61                          | 0.870 | 0.813 | 0.892 | 50.75      |
|            | 9              | 0.840                  | 0.679 | 0.903 | 31                          |       |       |       |            |
|            | 10             | 0.920                  | 0.857 | 0.944 | 53                          |       |       |       |            |
|            | 0              | 0.860                  | 0.821 | 0.875 | 58                          |       |       |       |            |

Table 8: Distribution of benign and malignant cases and tumour subtypes in the datasets by individual patient.

| Dataset                  | Specimen | Benign | Malignant | Tumour subtype |     |       |     |       |  |
|--------------------------|----------|--------|-----------|----------------|-----|-------|-----|-------|--|
|                          |          |        |           | HGIN           | TAC | MucAC | PCC | MixAC |  |
| Training                 | Biopsy   | 440    | 102       | 22             | 59  | 21    | 0   | 0     |  |
|                          | Surgical | 50     | 908       | 151            | 579 | 176   | 6   | 51    |  |
| Training (random forest) | Biopsy   | 114    | 32        | 2              | 21  | 0     | 2   | 7     |  |
|                          | Surgical | 14     | 52        | 5              | 42  | 2     | 1   | 8     |  |
| Validation               | Biopsy   | 119    | 60        | 0              | 27  | 6     | 13  | 14    |  |
|                          | Surgical | 7      | 86        | 7              | 51  | 8     | 12  | 15    |  |
| Internal examination     | Biopsy   | 68     | 27        | 3              | 20  | 0     | 7   | 0     |  |
|                          | Surgical | 4      | 1         | 0              | 1   | 0     | 0   | 0     |  |
| IHC                      | Biopsy   | 30     | 12        | 0              | 11  | 0     | 1   | 0     |  |
|                          | Surgical | 1      | 9         | 0              | 9   | 0     | 0   | 0     |  |
| Daily gastric (PLAGH)    | Biopsy   | 1599   | 61        | 12             | 42  | 4     | 2   | 10    |  |
|                          | Surgical | 36     | 118       | 16             | 83  | 6     | 4   | 25    |  |
| Multicentre (PUMCH)      | Biopsy   | 330    | 14        | 5              | 10  | 0     | 0   | 0     |  |
|                          | Surgical | 3      | 8         | 0              | 6   | 0     | 0   | 2     |  |
| Multicentre (CHCAMIS)    | Biopsy   | 396    | 59        | 6              | 51  | 0     | 3   | 5     |  |
|                          | Surgical | 15     | 71        | 2              | 49  | 1     | 3   | 19    |  |

Table 9: Distribution of benign and malignant cases and tumour subtypes in the datasets by individual slide.

| Dataset                  | Specimen | Benign | Malignant | Tumour subtype |     |       |     |       |  |
|--------------------------|----------|--------|-----------|----------------|-----|-------|-----|-------|--|
|                          |          |        |           | HGIN           | TAC | MucAC | PCC | MixAC |  |
| Training                 | Biopsy   | 639    | 102       | 22             | 59  | 21    | 0   | 0     |  |
|                          | Surgical | 93     | 1,289     | 242            | 760 | 274   | 11  | 63    |  |
| Training (random forest) | Biopsy   | 169    | 39        | 4              | 26  | 0     | 2   | 7     |  |
|                          | Surgical | 215    | 314       | 54             | 268 | 4     | 2   | 42    |  |
| Validation               | Biopsy   | 143    | 60        | 0              | 27  | 6     | 13  | 14    |  |
|                          | Surgical | 11     | 86        | 5              | 51  | 8     | 12  | 15    |  |
| Internal examination     | Biopsy   | 68     | 27        | 3              | 20  | 0     | 7   | 0     |  |
|                          | Surgical | 4      | 1         | 0              | 1   | 0     | 0   | 0     |  |
| IHC                      | Biopsy   | 50     | 22        | 0              | 23  | 0     | 1   | 0     |  |
|                          | Surgical | 7      | 20        | 0              | 25  | 0     | 0   | 0     |  |
| Daily gastric (PLAGH)    | Biopsy   | 2,085  | 124       | 20             | 93  | 5     | 8   | 6     |  |
|                          | Surgical | 495    | 508       | 51             | 354 | 26    | 22  | 118   |  |
| Multicentre (PUMCH)      | Biopsy   | 496    | 30        | 7              | 24  | 0     | 0   | 0     |  |
|                          | Surgical | 27     | 42        | 0              | 38  | 0     | 0   | 4     |  |
| Multicentre (CHCAMIS)    | Biopsy   | 685    | 81        | 20             | 68  | 0     | 5   | 8     |  |
|                          | Surgical | 67     | 154       | 6              | 105 | 3     | 6   | 43    |  |

Table 10: **The detailed training configurations for different deep learning models.**

| Deep learning model | Training iteration | Batch size | Learning rate      | Decay step (by 0.5) |
|---------------------|--------------------|------------|--------------------|---------------------|
| ResNet-50           | 145,000            | 10×4       | $2 \times 10^{-3}$ | 20,000              |
| Inception v3        | 51,000             | 32×4       | $1 \times 10^{-3}$ | 10,000              |
| DenseNet            | 165,000            | 20×4       | $2 \times 10^{-3}$ | 20,000              |
| U-Net               | 75,000             | 20×4       | $2 \times 10^{-3}$ | 20,000              |
| DeepLab v2          | 189,000            | 10×4       | $2 \times 10^{-3}$ | 20,000              |
| DeepLab v3          | 95,000             | 32×4       | $1 \times 10^{-3}$ | 20,000              |



Table 11: **Features used for the random forest model.** The eccentricity, extend, major axis length, and solidity are defined as ellipse with the same second moment, ratio of the region area over the bounding box, length of the major axis of the ellipse with the same normalized second central moment, and ratio of the region area over the surrounding convex, respectively.

| Number | Feature definition                                                                  |
|--------|-------------------------------------------------------------------------------------|
| 1-5    | Ratios of cancer to tissue (thresholds: 0.5, 0.6, 0.7, 0.8, 0.9)                    |
| 6-10   | Ratios of probability sum of cancer to tissue (thresholds: 0.5, 0.6, 0.7, 0.8, 0.9) |
| 11-14  | Largest area, eccentricity, extend, and bounding box area                           |
| 15     | Major axis length                                                                   |
| 16-17  | Maximum/minimum probability in the region                                           |
| 18     | Largest mean probability in the region                                              |
| 19     | Aspect ratio of the bounding box                                                    |
| 20     | Solidity                                                                            |
| 21-24  | Second largest area, eccentricity, extend, and bounding box area                    |
| 25     | Minor axis length                                                                   |
| 26-27  | Second maximum/minimum probability in the region                                    |
| 28     | Second largest mean probability in the region                                       |
| 29     | Aspect ratio of the bounding box (second largest)                                   |
| 30     | Second largest solidity                                                             |
